# Supplementary material for: Integrative phenomics reveals insight into the structure of phenotypic diversity in budding yeast
Source: HighWire-hosted journal article supplement (doi:10.1101/gr.155762.113), 2013-05-29
Supplement: Supplemental_Table3.xlsx [file Supplemental_Table3.xlsx]

## Sheet: metabolites
ID	retention time 1	retention time 2	Cas Number	Assigned metabolite name	KEGG ID	ChEBI ID	Mass	Other names
1064	440.312	1.74974	5630-81-9	Ethanedioic acid, bis(trimethylsilyl) ester			73
35	445.747	1.72255	125212-69-3	2-hydroxypyridine			152
2988	459.551	1.82936	3219-63-4	Phosphoenolpyruvate (PEP)	C00074	26055	73	PEP
41	465.909	1.87934	552-41-0	Silane, trimethylphenoxy-			151
3002	466.148	1.71525	105-68-0	2H-Pyran-2,6(3H)-dione, dihydro-4,4-dimethyl-			70
27	474.615	1.88159	53274-85-4	Propanoic acid, 2-[(trimethylsilyl)oxy]-, trimethylsilyl ester	C00186	16651	117	Lactic acid
1065	480.739	1.78993	55836-38-9	(“)-3-Methyl-2-oxovaleric acid, trimethylsilyl ester			159	Form of valeric acid
108	487.988	2.10935	19693-75-5	Acetamide, 2,2,2-trifluoro-N,N-bis(trimethylsilyl)-			73	some organic acid
117	505.439	1.89981	107-46-0	Propanoic acid, 2-oxo-3-(trimethylsilyl)-, trimethylsilyl ester			147
3004	515.213	1.75851	39772-63-9	n-Butylamine, N,N-bis(trimethylsilyl)			73
5	525	1.90808	14629-65-3	l-Alanine, N-(trimethylsilyl)-, trimethylsilyl ester	CO1401		116	Alanine
2984	525	2.38069	18269-50-6	Propane, 1,1-dimethoxy-			75
1809	525.316	1.68644	2110-78-3	Silane, [(2-ethylhexyl)oxy]trimethyl-			75
102	525.714	2.02255	18294-04-7	Disiloxane, hexamethyl-1			147	some organic acid
68	544.321	1.75303	53226-11-2	Tris(trimethylsilyl)hydroxylamine			73
52	544.75	1.91828	16654-69-6	Glycine, N-(trimethylsilyl)-, trimethylsilyl ester	C00037	15428	102	Glycine
42	551.154	1.7505	2043-43-8	Glycine, N,N-bis(trimethylsilyl)-, trimethylsilyl ester			248	Beta-alanine
58	559.881	1.97224	18294-04-7	Propanedioic acid, methyl-, bis(trimethylsilyl) ester			147
14	560.333	2.04206	692-04-6	Carnitine Fragment			130
154	578.594	1.77859	62199-57-9	Butanoic acid, 2-(methoxyimino)-3-methyl-, trimethylsilyl ester			89
2435	590	1.76745	692-04-6	Ethylbis(trimethylsilyl)amine			73
71	590	2.14568	3724-65-0	Acetic acid ethenyl ester			86
57	590.321	2.0041	35473-94-0	Triethylamine, 2-chloro-2'-(trimethyl)silyloxy-			100	Ethanolamine
29	609.882	1.90993	996-50-9	Butanoic acid, 2-[(trimethylsilyl)amino]-, trimethylsilyl ester	C03665		130	Methylalanine
103	612.744	2.14153	78-85-3	l-Proline, trimethylsilyl ester			70	Gluteraldehyde
37	620.361	2.71387	0-00-0	Methyl Phosphate	C00009	18367	241	Phosphate
43	624.471	1.78999	39772-63-9	Ethylbis(trimethylsilyl)amine1			174
81	635	2.46297	645-88-5	2-Propanol, 1-(1-methylethoxy)-1			73	Succinic semialdehyde
136	652.83	1.9451	55557-24-9	Butane, 1-(1-ethoxyethoxy)-			73	Valine (2nd peak)
72	662.802	1.91958	0-00-0	L-Valine, N-(trimethylsilyl)-, trimethylsilyl ester	C00183	16414	218	Valine
31	685.291	1.78395	692-04-6	Silanamine, 1,1,1-trimethyl-N-(trimethylsilyl)-N-[2-[(trimethylsilyl)oxy]ethyl]-			174	form of glycine
2983	699.744	2.05282	54745-23-2	Carnitine Fragment 31			73	Acetyl glycine
44	710.185	1.78093	105-57-7	Acetamide, 2,2,2-trifluoro-N,N-bis(trimethylsilyl)-1			73	some organic acid
87	712.443	2.12112	14629-65-3	Serine, bis(trimethylsilyl)-	C00065	17115	116	Serine
28	729.167	1.92032	55320-11-1	N,O-Bis-(trimethylsilyl)leucine	COO123	15603	158	Leucine
20	734.494	1.73136	33581-77-0	Trimethylsilyl ether of glycerol			117
1	735.22	2.49873	0-00-0	Silanol, trimethyl-, phosphate (3:1)	C00009	18367	133	Phosphate
25	740.222	1.94594	40333-07-1	Propanedioic acid, methyl-, bis(trimethylsilyl) ester1			147	Aminomalonic acid
22	740.398	1.81773	1962-05-04	Diethylamine, 2,2'-bis(trimethylsiloxy)-			130	Acetyl serine
24	754.67	2.40574	59-67-6	3-Pyridinecarboxylic acid, trimethylsilyl ester	C00253	15940	78	Niacin
23	754.944	1.91258	55320-11-1	L-Isoleucine, N-(trimethylsilyl)-, trimethylsilyl ester	C00407	17191	158	Isoleucine
84	757.753	2.08786	1825-66-7	l-Threonine, O-(trimethylsilyl)-, trimethylsilyl ester	C00188	16857	117	Threonine
98	760.075	1.94163	0-00-0	L-Proline, 1-(trimethylsilyl)-, trimethylsilyl ester	C00148	17203	142	Proline
126	771.132	1.92378	110-60-1	Glycine, N,N-bis(trimethylsilyl)-, trimethylsilyl ester1			174	Glycine
66	775.455	2.18322	18457-04-0	Butanedioic acid, bis(trimethylsilyl) ester	C00042	15741	147	Succinic acid
1811	778.312	2.03255	0-00-0	Butanoic acid, 3-[(trimethylsilyl)oxy]-, methyl ester			175
38	800.402	1.89596	0-00-0	Propanoic acid, 2,3-bis[(trimethylsilyl)oxy]-, trimethylsilyl ester	C00258	16659	73	Glyceric acid
73	807.473	1.88993	123-56-8	Uracil, 1,3-bis(trimethylsilyl)-	C00106	17568	99	Uracil
141	810.385	2.18133	55494-04-7	Malonic acid, bis(trimethylsilyl) ester2			147	Citraconic acid
91	819.877	2.15116	18294-04-7	Malonic acid, bis(trimethylsilyl) ester21			147	methylfumarate
132	828.571	2.05794	82614-87-7	Silane, (2-ethoxyethoxy)trimethyl-			103	Homoserine
2996	831.014	1.8987	19127-15-2	Serine tritms	C00065	17115	204	Serine
62	833.667	1.93788	25561-30-2	Silanamine, 1,1,1-trimethyl-N-(1-methyl-2-phenylethyl)-N-(trimethylsilyl)-, (“)-			188	alanine?
76	863.167	1.88307	56273-04-2	N,O,O-Tris(trimethylsilyl)-L-threonine	C00188	16857	117	Threonine
39	900.455	2.27957	0-00-0	l-Aspartic acid, bis(trimethylsilyl) ester	C00402	17364	75	Aspartic acid
93	929.873	1.90094	7364-50-3	L-Homoserine, N,O-bis(trimethylsilyl)-, trimethylsilyl ester			73	Homoserine
104	937.099	1.98591	54965-74-1	2-Piperidone, 1-(trimethylsilyl)-3-[(trimethylsilyl)amino]-			128	asparagine?
128	946.901	2.09526	3429-76-3	Acetic acid, pentyl ester			70	1-pentylacetate
2975	950.064	1.9391	1825-64-5	7-Trimethylsilyloxytridecane			75	Ala-pro
2	974.943	2.03841	18294-04-7	Malic acid, tris(trimethylsilyl) ester	C00149	15595	73	Malic acid
89	976.163	2.29987	0-00-0	Thiazole, 2-hydroxy-4-methyl-5-(∑-chloroethyl)-			128	homoserine?
59	980.488	3.72766	3641-13-2	2-Pyrrolidone-5-carboxylic acid, trimethylsilyl ester			84	Pyroglutamate
107	983.269	2.42608	590-42-1	asparagine 4			100	Asparagine
127	1004.11	2.05534	53261-79-3	L-Aspartic acid, N-(trimethylsilyl)-, bis(trimethylsilyl) ester	C00402	17364	232	Aspartic acid
90	1004.19	2.06961	53261-79-3	L-Methionine, N-(trimethylsilyl)-, trimethylsilyl ester	C00073	16811	128	Methionine
45	1010.57	2.69753	55255-44-2	L-Proline, 5-oxo-1-(trimethylsilyl)-, trimethylsilyl ester	C00148	17203	156	Proline
26	1014.83	2.28118	0-00-0	L-Glutamic acid, N-acetyl-, bis(trimethylsilyl) deriv.			84	Acetylglutamic acid
2986	1029.87	1.79795	79-16-3	1,3-Benzoxazol-2-amine-ditms			263	Adenine
123	1035	1.88323	123-86-4	2-Butenedioic acid (Z)-, bis(trimethylsilyl) ester1			245	NAD fragment?
83	1035.62	2.19999	101-49-5	Alanine, phenyl-, trimethylsilyl ester, dl-	C00079	17295	120	Phenylalanine
67	1060.4	2.05969	0-00-0	Pentanedioic acid, 2-[(trimethylsilyl)oxy]-, bis(trimethylsilyl) ester			73	Alphaketoglutarate
3000	1084.31	2.54885	1944-10-09	Butanoic acid, 2-methyl-, trimethylsilyl ester			73	delphinic acid
111	1097.14	1.9073	74-79-3	Citrulline 2	C00327	18211	142	Citrulline
97	1103.47	2.09231	0-00-0	Glutamate1	C00217	15966	246	Glutamate
118	1104.38	2.08245	0-00-0	Glutamate1	C00217	15966	246	Glutamate
2992	1114.44	2.00183	64625-17-8	N,O-Bis(trimethylsilyl)-L-phenylalanine	C00079	17295	73	Phenylalanine
3008	1114.55	1.72523	111-43-3	Propane, 1-ethoxy-2-methyl-			102
53	1130	1.89976	169597-14-2	Propanoic acid, 2-oxo-, trimethylsilyl ester			75	Dodecanoic acid
140	1149.25	1.99954	14475-42-4	Homocysteine, N,O,S-tris9trimethylsilyl)-	C05330	17230	128	Homocysteine
130	1156.29	2.2737	617-35-6	L-Asparagine, N,N2-bis(trimethylsilyl)-, trimethylsilyl ester	C00152	17196	73	Asparagine
16	1175.06	1.70251	130405-10-6	d-Xylose, 2,3,4,5-tetrakis-O-(trimethylsilyl)-, O-methyloxime	C00181	15936	103	Ribose?
105	1179.85	2.5917	14246-15-2	glutamine 21	C00064	18050	75	Glutamine
1812	1198.55	2.06674	55494-10-5	?-Aminoadipic acid triTMS	C00956	17082	73	Aminoadipic acid
1075	1206.92	1.80427	26429-16-3	N-Ethylformamide2			73
137	1217.69	1.88399	0-00-0	Glutamine			73	glutamine?
100	1220.63	2.16125	628-63-7	citrulline 21			70
88	1226.08	2.17221	18294-04-7	Ethanedioic acid, bis(trimethylsilyl) ester7	C00417	32805	73	Aconitic acid
11	1234.89	2.04654	5630-81-9	ornithine 2			174	Ornithine
46	1250.18	2.20634	55520-87-1	Phosphoric acid, bis(trimethylsilyl) 2,3-bis[(trimethylsilyl)oxy]propyl ester	C00093		299	Glycerol-1-phosphate
124	1250.51	2.32521	55255-44-2	Glutamine2	C00064	18050	156	Glutamine
106	1292.8	1.91628	0-00-0	Arginine	C00062	16467	142	Arginine
112	1300.08	1.99295	0-00-0	Citrulline, tetra(trimethylsilyl)-	C00327	18211	157	Citrulline
32	1310.06	1.87402	0-00-0	Tetradecanoic acid, trimethylsilyl ester	C06424	28875	75	Myristic acid
70	1324.01	2.03811	39772-63-9	Lysine	C00047	18019	174	Lysine
95	1340	2.04264	73-24-5	9H-Purin-6-amine, N,9-bis(trimethylsilyl)-	C00147	16708	264	Adenine
113	1354.82	2.12398	26205-39-0	Tyrosine, O-trimethylsilyl-, trimethylsilyl ester	C00082	17895	179	Tyrosine
85	1375.92	1.73173	128705-73-7	d-Glucose, 2,3,4,5,6-pentakis-O-(trimethylsilyl)-, o-methyloxyme, (1E)-			73	Glucose
114	1382.33	1.89609	0-08-8	L-Lysine, N2,N6,N6-tris(trimethylsilyl)-, trimethylsilyl ester	C00047	18019	174
135	1387.06	2.02476	0-00-0	Bis(dimethyl-t-butylsilyl) maleate			287	2-octenoic acid
1814	1395.23	1.7703	75-76-3	d-Glucose, 2,3,4,5,6-pentakis-O-(trimethylsilyl)-, o-methyloxyme, (1E)-1			73	Glucose
129	1400.21	1.96038	20836-41-3	L-Tyrosine, N,O-bis(trimethylsilyl)-, trimethylsilyl ester			73	Tyrosine?
2982	1410.55	1.74544	14199-72-5	Xylitol, 1,2,3,4,5-pentakis-O-(trimethylsilyl)-			73	Galactose
1067	1459.92	1.87857	96851-47-7	Palmitelaidic acid, trimethylsilyl ester	C00249	15756	75	Hexadecanoic acid
55	1535.94	1.82582	29267-01-4	Myo-Inositol, 1,2,3,4,5,6-hexakis-O-(trimethylsilyl)-	C00137	17268	73	Myo-inositol
75	1605.79	1.85528	96851-53-5	Oleic acid, trimethylsilyl ester	C00712	16196	75	Oleic acid
34	1625	1.83807	55494-06-9	Hexadecanoic acid, trimethylsilyl ester1	C01530	28842	75	Stearic acid
3001	1789.9	1.74846	56196-07-7	d-Galactose, 2,3,4,5,6-pentakis-O-(trimethylsilyl)-, o-methyloxyme, (1Z)-1			119	Galactose
119	1801.37	1.75883	162514-01-4	d-Galactose, 2,3,4,5,6-pentakis-O-(trimethylsilyl)-, o-methyloxyme, (1Z)-2			73	Galactose?
1072	1810.8	1.81088	75-76-3	Xylitol, 1,2,3,4,5-pentakis-O-(trimethylsilyl)-2			73
122	1826.54	1.73404	14199-72-5	Xylitol, 1,2,3,4,5-pentakis-O-(trimethylsilyl)-3			217	Glucose-1-p?
2994	1865.38	1.73769	600-18-0	Silane, trimethyl-7			73
1810	1990.78	1.75325	33428-94-3	Trehalose			73	Trehalose/Maltose
54	2105.93	1.84064	32166-80-6	Glucopyranose, pentakis-O-trimethylsilyl-			204	Melibiose
2437	2265.27	2.12813	75-76-3	Trimethyl[4-(1,1,3,3,-tetramethylbutyl)phenoxy]silane			73	ergosterol pathway?
109	2270.92	2.14784	0-00-0	1,3-Benzenediol, o-(4-ethylbenzoyl)-o'-(3-methylbenzoyl)-			133	benzene-ring containing, possible phosphorylation
